# Supplementary material for: Durability Improvement of Concentrated Polymer Brushes by Multiscale Texturing
Source: Research Square preprint supplement (doi:10.21203/rs.3.rs-363726/v1), 2021-04-01
Supplement: Supplementary file 1 [file 5fa1f4bcd19536debb3e7794.docx]

Table 3 Specifications of combination of nano-periodic structures and groove texture and sliding direction

| Texture patterns | Schematic |
| --- | --- |
| Non-textured |  |
| Nano 0-Per  (nano-periodic structure is applied along groove texture and slid to perpendicular direction) | 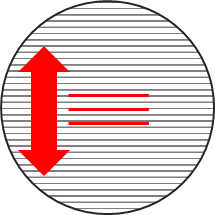 |
| Nano 45-Per  (nano-periodic structure is applied diagonal to groove texture and slid to perpendicular direction) | 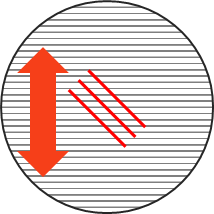 |
| Nano 90-Per  (nano-periodic structure is applied orthogonal to groove texture and slid to perpendicular direction) | 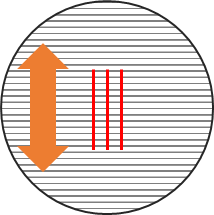 |
| Nano 0-Pll  (nano-periodic structure is applied along groove texture and slid to parallel direction) | 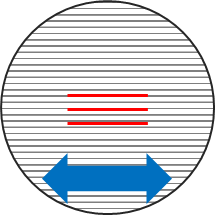 |
| Nano 45-Pll  (nano-periodic structure is applied diagonal to groove texture and slid to parallel direction) | 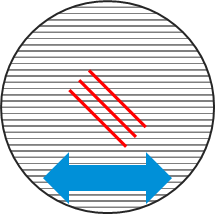 |
| Nano 90-Pll  (nano-periodic structure is applied orthogonal to groove texture and slid to parallel direction) | 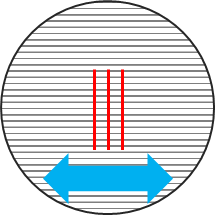 |
